# Supplementary material for: HBXIP induces anoikis resistance by forming a reciprocal feedback loop with Nrf2 to maintain redox homeostasis and stabilize Prdx1 in breast cancer
Source: PubMed Central journal article supplement (PMC8758767; doi:10.1038/s41523-021-00374-x), 2022-01-13
Supplement: 41523_2021_374_MOESM1_ESM.pdf [file 41523_2021_374_MOESM1_ESM.pdf]

## Supplementary Information

Supplementary Table 1. Key resources

| REAGENT or RESOURCE                                   | SOURCE                    | IDENTIFIER                                                                   |
|-------------------------------------------------------|---------------------------|------------------------------------------------------------------------------|
| <b>Antibodies</b>                                     |                           |                                                                              |
| ANTI- $\beta$ -actin (clone AC-74) Mouse mAb          | WB: 1:2000                | Sigma-Aldrich (St. Louis, MO, USA)<br>Cat# A2228, RRID: AB_476697            |
| ANTI-FLAG <sup>®</sup> M2 Mouse mAb                   | WB: 1:2000                | Sigma-Aldrich (St. Louis, MO, USA)<br>Cat# F1804, RRID: AB_262044            |
| Anti-HBXIP (H-5) Mouse mAb                            | WB: 1:800<br>IHC: 1:100   | Santa Cruz Biotechnology<br>Cat# sc-373980, RRID: AB_10918789                |
| Anti-NRF2 (D1Z9C) XP <sup>®</sup> Rabbit mAb          | WB: 1:1000<br>ChIP: 1:200 | Cell Signaling Technology (Danvers, MA, USA)<br>Cat# 12721, RRID: AB_2715528 |
| Rabbit (DA1E) mAb IgG XP <sup>®</sup> Isotype Control | ChIP: 1:200               | Cell Signaling Technology (Danvers, MA, USA)<br>Cat# 3900, RRID: AB_1550038  |
| Anti-Caspase-3 (3G2) Mouse mAb                        | WB: 1:1000                | Cell Signaling Technology (Danvers, MA, USA)<br>Cat# 9668, RRID: AB_2069870  |
| Anti-Caspase-7 (C7) Mouse mAb                         | WB: 1:1000                | Cell Signaling Technology (Danvers, MA, USA)<br>Cat#9494, RRID: AB_2068141   |
| Anti-PARP (46D11) Rabbit mAb                          | WB: 1:1000                | Cell Signaling Technology (Danvers, MA, USA)<br>Cat# 9532, RRID: AB_659884   |
| Anti-GST3/GSTpi Goat pAb                              | WB: 1:2500<br>IP: 1:200   | Abcam (Cambridge, MA)<br>Cat# ab53943, RRID: AB_873819                       |
| Goat IgG Isotype Control                              | IP: 1:200                 | Invitrogen, Thermo Fisher Scientific, USA<br>Cat# 02-6202, RRID: AB_2532946  |
| Anti-JNK1 Rabbit mAb                                  | WB: 1:2000                | Abcam (Cambridge, MA)<br>Cat# ab110724, RRID: AB_10866293                    |
| Anti-phospho-JNK1 Rabbit                              | WB: 1:1000                | Abcam<br>Cat# ab46821, RRID: AB_881487                                       |

|                                             |                                           |                                    |                                |
|---------------------------------------------|-------------------------------------------|------------------------------------|--------------------------------|
| mAb                                         |                                           | (Cambridge, MA)                    |                                |
| Anti-Peroxiredoxin 1 Mouse mAb              | WB: ~0.1 $\mu$ g/ml                       | R&D Systems (Minneapolis, MN, USA) | Cat# MAB3488, RRID: AB_2170319 |
| Anti-E6AP Rabbit pAb                        | WB: 1:1000                                | Abcam (Cambridge, MA)              | Cat# ab3519, RRID: AB_303868   |
| Anti-Human Ubiquitin Rabbit pAb             | WB: 1:1000                                | R&D Systems (Minneapolis, MN, USA) | Cat# A-100, RRID: AB_10971295  |
| <b>Chemicals and reagents</b>               |                                           |                                    |                                |
| N-Acetyl-L-cysteine, NAC                    | Sigma-Aldrich (St. Louis, MO, USA)        |                                    | Cat# A7250                     |
| Human insulin                               | Sigma-Aldrich (St. Louis, MO, USA)        |                                    | Cat# I9278                     |
| $\lambda$ phosphatase                       | New England Biolabs (Ipswich, MA, USA)    |                                    | Cat# P0753                     |
| MEM Non-Essential Amino Acids Solution      | Invitrogen, Thermo Fisher Scientific, USA |                                    | Cat# 11140050                  |
| tert-Butylhydroquinone, tBHQ                | Sigma-Aldrich (St. Louis, MO, USA)        |                                    | Cat# 112941                    |
| ML385                                       | Sigma-Aldrich (St. Louis, MO, USA)        |                                    | Cat# SML1833                   |
| Polybrene                                   | Sigma-Aldrich (St. Louis, MO, USA)        |                                    | Cat# 107689                    |
| Poly-HEMA                                   | Sigma-Aldrich (St. Louis, MO, USA)        |                                    | Cat# P3932                     |
| Matrigel basement membrane-like matrix      | Corning (Medfield, MA, USA)               |                                    | Cat# 354234                    |
| TRIzol™ Reagent                             | Invitrogen, Thermo Fisher Scientific, USA |                                    | Cat# 15596018                  |
| Lipofectamine 2000                          | Invitrogen, Thermo Fisher Scientific, USA |                                    | Cat# 11668019                  |
| Lipofectamine™ RNAiMAX Transfection Reagent | Invitrogen, Thermo Fisher Scientific, USA |                                    | Cat# 13778075                  |
| Hydrogen peroxide                           | Thermo Fisher Scientific, USA             |                                    | Cat# BSPA5                     |
| SP600125                                    | MedChemExpress (Princeton, NJ, USA)       |                                    | Cat# HY-12041                  |
| DB07268                                     | MedChemExpress (Princeton, NJ, USA)       |                                    | Cat# HY-15737                  |
| Age I                                       | New England Biolabs (Ipswich, MA, USA)    |                                    | Cat# R0552                     |

|                                                                |                                                             |               |
|----------------------------------------------------------------|-------------------------------------------------------------|---------------|
| EcoR I                                                         | New England Biolabs (Ipswich, MA, USA)                      | Cat# R0101    |
| BamH I                                                         | New England Biolabs (Ipswich, MA, USA)                      | Cat# R0136    |
| Xho I                                                          | New England Biolabs (Ipswich, MA, USA)                      | Cat# R0146    |
| HindIII                                                        | New England Biolabs (Ipswich, MA, USA)                      | Cat# R0104    |
| Bouin's fixative solution                                      | Solarbio (Beijing, China)                                   | Cat# G2331    |
| DMEM (high glucose, with L-glutamine, without sodium pyruvate) | Hyclone (Logan, UT, USA)                                    | Cat# SH30022  |
| DMEM (high glucose, with L-glutamine and sodium pyruvate)      | Hyclone (Logan, UT, USA)                                    | Cat# SH30243  |
| L-15 (with L-glutamine)                                        | Hyclone (Logan, UT, USA)                                    | Cat# SH30525  |
| <b>Critical commercial assays</b>                              |                                                             |               |
| Annexin V-FITC-PI apoptosis detection kit                      | Vazyme Biotech (Nanjing, China)                             | Cat# KGA108   |
| PrimeScript™ 1st Strand cDNA Synthesis Kit                     | TaKaRa Bio (Dalian, China)                                  | Cat# 6110     |
| GeneArt™ Site-directed Mutagenesis System                      | Invitrogen, Thermo Fisher Scientific, USA                   | Cat# A13282   |
| Dual-Luciferase® Reporter Assay System                         | Promega (Madison, WI, USA)                                  | Cat# E1910    |
| Reactive oxygen species Assay Kit                              | Nanjing Jiancheng Bioengineering Institute (Nanjing, China) | Cat# E004-1   |
| Coenzyme II (NADP /NADPH) content test kit                     | Nanjing Jiancheng Bioengineering Institute (Nanjing, China) | Cat# A115-1   |
| Reduced glutathione (GSH) assay kit                            | Nanjing Jiancheng Bioengineering Institute (Nanjing, China) | Cat# A006-2   |
| ATP assay kit                                                  | Nanjing Jiancheng Bioengineering Institute (Nanjing, China) | Cat# A095-2   |
| Mitochondrial membrane potential detection kit                 | Nanjing Jiancheng Bioengineering Institute (Nanjing, China) | Cat# G009-1   |
| Lenti-X™ HTX Packaging System                                  | CLONTECH Laboratories, Inc., (Palo Alto, CA)                | Cat# PT5135-2 |
| NE-PER™ Nuclear and                                            | Thermo Fisher Scientific, USA                               | Cat# 78833    |

|                                                                                         |                                              |                  |
|-----------------------------------------------------------------------------------------|----------------------------------------------|------------------|
| Cytoplasmic Extraction Reagents                                                         |                                              |                  |
| Hematoxylin and Eosin Staining Kit                                                      | Beyotime Biothenology (Shanghai, China)      | Cat# C0105       |
| Protein G Immunoprecipitation Kit                                                       | Sigma-Aldrich (St. Louis, MO, USA)           | Cat# IP50        |
| TF Activation Profiling Plate Array II with Nuclear Extraction Kit                      | Signosis, Inc. (Sunnyvale, CA)               | Cat# FA-1002-NE  |
| QuikChIP CHIP Kit                                                                       | Novus Biologicals (LLC., Littleton, CO, USA) | Cat# NBP2-29902  |
| <i>ProteinExt</i> <sup>®</sup> Mammalian Total Protein Extraction Kit                   | Transgen (Beijing, China)                    | Cat# DE101-01    |
| <i>ProteinExt</i> <sup>®</sup> Mammalian Nuclear and Cytoplasmic Protein Extraction Kit | Transgen (Beijing, China)                    | Cat# DE201-01    |
| Hematoxylin and Eosin Stain Kit                                                         | Solarbio (Beijing, China)                    | Cat# G1121-4     |
| Mouse Cell Depletion Kit                                                                | Miltenyi Biotec Inc. (Auburn, CA, USA)       | Cat# 130-104-694 |
| <b>Recombinant DNA</b>                                                                  |                                              |                  |
| psPAX2                                                                                  | Laboratory of Xiaolei Zhou                   | N/A              |
| pMD2.G                                                                                  | Laboratory of Xiaolei Zhou                   | N/A              |
| pLKO.1-puro                                                                             | Laboratory of Xiaolei Zhou                   | N/A              |
| pLKO.1-neo                                                                              | Laboratory of Xiaolei Zhou                   | N/A              |
| pLVSIN-CMV pur                                                                          | TaKaRa Bio (Shiga, Japan)                    | Cat# 6183        |
| pLVSIN-CMV Hyg                                                                          | TaKaRa Bio (Shiga, Japan)                    | Cat# 6182        |
| pLVSIN-Control                                                                          | Laboratory of Xiaolei Zhou                   | N/A              |
| pLVSIN-HBXIP (neo)                                                                      | Laboratory of Xiaolei Zhou                   | N/A              |
| pLVSIN-Nrf2 (puro)                                                                      | This paper                                   | ID: 179281       |
| pLVSIN-Prdx1 (hyg)                                                                      | This paper                                   | ID: 179295       |
| pLKO-shControl                                                                          | Laboratory of Xiaolei Zhou                   | N/A              |
| pLKO-shHBXIP (puro)                                                                     | Laboratory of Xiaolei Zhou                   | N/A              |
| pLKO-shNrf2 (neo)                                                                       | This paper                                   | ID: 179300       |
| pLKO-shPrdx1 (hyg)                                                                      | This paper                                   | ID: 179301       |
| pRL-TK                                                                                  | Laboratory of Xiaolei Zhou                   | N/A              |
| pCMV-SATB1                                                                              | This paper                                   | ID: 179302       |
| pCMV-Nrf2                                                                               | Laboratory of Xiaolei Zhou                   | N/A              |
| pCMV-Sox2                                                                               | This paper                                   | ID: 179303       |
| pCMV-HBXIP                                                                              | Laboratory of Xiaolei Zhou                   | N/A              |
| pGL3-HBXIP-FL                                                                           | This paper                                   | ID: 179304       |
| pGL3-HBXIP-1688                                                                         | This paper                                   | ID: 179305       |
| pGL3-HBXIP-1704                                                                         | This paper                                   | ID: 179306       |
| pGL3-HBXIP-1025                                                                         | This paper                                   | ID: 179307       |

|                                 |                            |               |
|---------------------------------|----------------------------|---------------|
| pGL3-HBXIP-808                  | This paper                 | ID: 179308    |
| pGL3-NQO1-ARE                   | This paper                 | N/AID: 179313 |
| pGL3-HBXIP-MT3                  | This paper                 | ID: 179309    |
| pGL3-HBXIP-MT2                  | This paper                 | ID: 179310    |
| pGL3-HBXIP-MT1                  | This paper                 | ID: 179311    |
| pGL3-HBXIP-MT1/2                | This paper                 | ID: 179312    |
| <b>Recombinant lentiviruses</b> |                            |               |
| LV-Control                      | Laboratory of Xiaolei Zhou | N/A           |
| LV-HBXIP (neo)                  | Laboratory of Xiaolei Zhou | N/A           |
| LV-HBXIP (puro)                 | This paper                 | N/A           |
| LV-Nrf2 (puro)                  | This paper                 | N/A           |
| LV-Prdx1 (hyg)                  | This paper                 | N/A           |
| LK-shControl                    | Laboratory of Xiaolei Zhou | N/A           |
| LK-shHBXIP (puro)               | Laboratory of Xiaolei Zhou | N/A           |
| LK-shNrf2 (neo)                 | This paper                 | N/A           |
| LK-shNrf2 (puro)                | This paper                 | N/A           |
| LK-Prdx1 (hyg)                  | This paper                 | N/A           |

**Supplementary Table 2. Primers used in this study**

| Name                        | Primer  | Sequence                                    |
|-----------------------------|---------|---------------------------------------------|
| <b>For cDNA cloning</b>     |         |                                             |
| Nrf2                        | Forward | 5'-CTCGAGATGATGGACTTGGAGCTGCC-3'            |
|                             | Reverse | 5'-GGATCCCTAAATCTAGTTTTTCTTAACATCTGGCTTC-3' |
| SATB1                       | Forward | 5'-GGATCCATGGATCATTGGAACGAGGC-3'            |
|                             | Reverse | 5'-AAGCTTATCTCAGTCTTCAAATCAGTATTAATGTC-3'   |
| Sox2                        | Forward | 5'-GGATCCATGTACAACATGATGGAGACGGAG-3'        |
|                             | Reverse | 5'-AAGCTTGGCCCTCACATGTGTGAGAG-3'            |
| Prdx1                       | Forward | 5'-GGATCCATGTCTTCAGGAAATGCTAAAATTGGGC-3'    |
|                             | Reverse | 5'-AAGCTTTCACCTTCTGCTTGGAGAAATATTCTTTGC-3'  |
| <b>For promoter cloning</b> |         |                                             |
| HBXIP-FL                    | Forward | 5'-CGGGTACCCACCAGGCAGTACTTATGTTTTCTAATG-3'  |
|                             | Reverse | 5'-CGACGCGTGAGGCGCGCACTACTCACGT-3'          |

|                              |         |                                                                 |
|------------------------------|---------|-----------------------------------------------------------------|
|                              | e       |                                                                 |
| HBXIP-1688                   | Forward | 5'-CGGGTACCCAAGGAAGCTGCAAGCTTCA-3'                              |
|                              | Reverse | 5'-CGACGCGTGAGGCGCGCACTACTCACGT-3'                              |
| HBXIP-1074                   | Forward | 5'-CGGGTACCGAACCTAGAAGGCTGAGGCT-3'                              |
|                              | Reverse | 5'-CGACGCGTGAGGCGCGCACTACTCACGT-3'                              |
| HBXIP-1025                   | Forward | 5'-CGGGTACCCCAACCTTAATCCACAATTAAGATACA-3'                       |
|                              | Reverse | 5'-CGACGCGTGAGGCGCGCACTACTCACGT-3'                              |
| HBXIP-808                    | Forward | 5'-CGGGTACCCACATTTTGGGAGGCTGGA-3'                               |
|                              | Reverse | 5'-CGACGCGTGAGGCGCGCACTACTCACGT-3'                              |
| NQO1-ARE                     | Forward | 5'-GGGGCTAGCTCCGGGTTCAAGCGATTC-3'                               |
|                              | Reverse | 5'-CCCCGGGGCTCTGGTGCAGTCCGG-3'                                  |
| <b>For promoter mutation</b> |         |                                                                 |
| HBXIP-MT1                    | Forward | 5'-CAAAAAAAAAACCATGCTAGGCGTGTGTCAGACTAATGTAATCACATTTTGGGAGG-3'  |
|                              | Reverse | 5'-CCTCCCAAATGTGATTACATTAGTCTGACACACGCCTAGCATGGTTTTTTTTTG-3'    |
| HBXIP-MT2                    | Forward | 5'-GAAGGCTGAGGCTGGACTAAGCCCGTCGCTGTAAACTGCACTCCAACCTTAATCCAC-3' |
|                              | Reverse | 5'-GTGGATTAAGGTTGGAGTGCAGTTTACAGCGACGGGCTTAGTCCAGCCTCAGCCTTC-3' |
| HBXIP-MT3                    | Forward | 5'-CAGGAGGCAGAGGTTGCAGTGAGAGTCTCATTATCCACTGCACTCCAGCCTGGGCG-3'  |
|                              | Reverse | 5'-CGCCCAGGCTGGAGTGCAGTGGATAATGAGACTCTCACTGCAACCTCTGCCTCTG-3'   |
| <b>For ChIP-qRT-PCR</b>      |         |                                                                 |
| GAPDH                        | Forward | 5'-TCCTGCACCACCAACTGCTTAG-3'                                    |
|                              | Reverse | 5'-GATGACCTTGCCACAGCCTTG-3'                                     |
| NQO1-ARE                     | Forward | 5'-CAGTGGCATGCACCCAGGGAA-3'                                     |
|                              | Reverse | 5'-GCATGCCCTTTTAGCCTTGGCA-3'                                    |

|                      |         |                                    |
|----------------------|---------|------------------------------------|
| HBXIP-ARE 1          | Forward | 5'-GTACCTCCAGTATGTATGTCAATTTTGC-3' |
|                      | Reverse | 5'-TGGTCTTAAACTCCTTGCTTCAACAG-3'   |
| HBXIP-ARE 2          | Forward | 5'-AAGATCGCTTGAACCTAGAAGGC-3'      |
|                      | Reverse | 5'-GTTTTCACTTACATCCTTTGTAGTAGTT-3' |
| HBXIP-ARE 3          | Forward | 5'-GTAATCCCAGCTACTCGGGA-3'         |
|                      | Reverse | 5'-GAGACAGAGTCTTGCTCTATCGC-3'      |
| <b>For qRT-PCR</b>   |         |                                    |
| HBXIP                | Forward | 5'-CTTGGAGCAGCACTTGAAGA-3'         |
|                      | Reverse | 5'-ATGCCATCGTGTTTCTGGATC-3'        |
| GAPDH                | Forward | 5'-TCCTGCACCACCAACTGCTTAG-3'       |
|                      | Reverse | 5'-GATGACCTTGCCCACAGCCTTG-3'       |
| <b>For RT-PCR</b>    |         |                                    |
| Prdx1 (for RT-PCR)   | Forward | 5'-GTCCCACGGAGATCATTGCTTTC-3'      |
|                      | Reverse | 5'-CCCCTGAAAGAGATACCTTCATC-3'      |
| β-actin (for RT-PCR) | Forward | 5'-ACTTGCGCTCAGGAGGAGCAATG-3'      |
|                      | Reverse | 5'-GAGATGGCCACTGCCGCATCCTCTT-3'    |

**Supplementary Table 3. Cell lines used in this study**

| Cell              | SOURCE                          | RRID                                          | Medium | Serum   | Additive                 | CO <sub>2</sub> |
|-------------------|---------------------------------|-----------------------------------------------|--------|---------|--------------------------|-----------------|
| Human: MCF-7      | ATCC Laboratory of Xiaolei Zhou | Cat# HTB-22TM, Lot# 60012672, RRID: CVCL_0031 | DMEM   | 10% FBS | 1% s/p                   | 5%              |
| Human: MDA-MB-436 | ATCC Laboratory of              | Cat# HTB-130,                                 | L-15   | 10% FBS | 10 μg/ml insulin, 1% s/p | -               |

|                                       |                                       |                                                               |      |         |                                                                            |    |
|---------------------------------------|---------------------------------------|---------------------------------------------------------------|------|---------|----------------------------------------------------------------------------|----|
|                                       | Xiaolei Zhou                          | Lot#<br>61331460 ,<br>RRID:<br>CVCL_0623                      |      |         |                                                                            |    |
| Human: HEK293                         | ATCC<br>Laboratory of<br>Xiaolei Zhou | Cat#<br>CRL-1573™,<br>Lot#<br>7681666 ,<br>RRID:<br>CVCL_0045 | DMEM | 10% FBS | 1% s/p                                                                     | 5% |
| Human: 293T                           | ATCC<br>Laboratory of<br>Xiaolei Zhou | Cat#<br>CRL-3216,<br>RRID:<br>CVCL_0063                       | DMEM | 10% FBS | 1% s/p                                                                     | 5% |
| Human: MCF-HBXIP                      | Laboratory of<br>Xiaolei Zhou         | N/A                                                           | DMEM | 10% FBS | 1% s/p, 200<br>µg/ml G418                                                  | 5% |
| Human<br>MDA-MB-436-HBXIP KD          | Laboratory of<br>Xiaolei Zhou         | N/A                                                           | L-15 | 10% FBS | 10 µg/ml<br>insulin, 1%<br>s/p, 2 µg/ml<br>puromycin                       | -  |
| Human: MCF-Nrf2 KD                    | This paper                            | N/A                                                           | DMEM | 10% FBS | 1% s/p, 200<br>µg/ml G418                                                  | 5% |
| Human: MCF-Nrf2                       | This paper                            | N/A                                                           | DMEM | 10% FBS | 1% s/p, 2<br>µg/ml<br>puromycin                                            | 5% |
| Human<br>MDA-MB-436-Nrf2 KD           | This paper                            | N/A                                                           | L-15 | 10% FBS | 10 µg/ml<br>insulin, 1%<br>s/p, 2 µg/ml<br>puromycin                       | -  |
| Human: MCF-HBXIP/Nrf2                 | This paper                            | N/A                                                           | DMEM | 10% FBS | 1% s/p, 2<br>µg/ml<br>puromycin,<br>200 µg/ml<br>G418                      | 5% |
| Human:<br>MDA-MB-436-HBXIP/Nrf2<br>KD | This paper                            | N/A                                                           | L-15 | 10% FBS | 10 µg/ml<br>insulin, 1%<br>s/p, 2 µg/ml<br>puromycin,<br>200 µg/ml<br>G418 | -  |
| Human : MCF-HBXIP<br>OE/Nrf2 KD       | This paper                            | N/A                                                           | DMEM | 10% FBS | 1% s/p, 2<br>µg/ml<br>puromycin,<br>200 µg/ml                              | 5% |



|                                          |                               |     |      |         |                                                                                           |    |
|------------------------------------------|-------------------------------|-----|------|---------|-------------------------------------------------------------------------------------------|----|
|                                          |                               |     |      |         | G418                                                                                      |    |
| Human : MCF-HBXIP<br>KD/Nrf2 OE          | This paper                    | N/A | DMEM | 10% FBS | 1% s/p, 2<br>μg/ml<br>puromycin,<br>200 μg/ml<br>G418                                     | 5% |
| Human:<br>MDA-MB-436-HBXIP<br>OE/Nrf2 KD | This paper                    | N/A | L-15 | 10% FBS | 10 μg/ml<br>insulin, 1%<br>s/p, 2 μg/ml<br>puromycin,<br>200 μg/ml<br>G418                | -  |
| Human:<br>MDA-MB-436-HBXIP<br>KD/Nrf2 OE | This paper                    | N/A | L-15 | 10% FBS | 10 μg/ml<br>insulin, 1%<br>s/p, 2 μg/ml<br>puromycin,<br>200 μg/ml<br>G418                |    |
| Mouse: MEF wt                            | Laboratory of<br>Xiaolei Zhou | N/A | DMEM | 10% FBS | 1%<br>non-essential<br>amino acids,<br>5 mM<br>glutamine, 1%<br>s/p                       | 5% |
| Mouse: <i>HBXIP</i> <sup>-/-</sup> MEF   | Laboratory of<br>Xiaolei Zhou | N/A | DMEM | 10% FBS | 1%<br>non-essential<br>amino acids,<br>1% s/p, 5 mM<br>glutamine, 2<br>μg/ml<br>puromycin | 5% |
| Mouse: <i>Nrf2</i> <sup>-/-</sup> MEF    | Tohoku<br>University, Japan   | N/A | DMEM | 10% FBS | 1%<br>non-essential<br>amino acids,<br>5 mM<br>glutamine, 1%<br>s/p                       | 5% |

**Supplementary Table 4. siRNA sequences**

| Name      | Sequence                  |
|-----------|---------------------------|
| siHBXIP-1 | 5'-CGGAAGCGCAGUGAUGUUU-3' |
| siHBXIP-2 | 5'-CAGAGGUUAGCUUAGCUGC-3' |

|          |                              |
|----------|------------------------------|
| siNrf2-1 | 5'- AGUUGAGCUUCAUUGAACUGC-3' |
| siNrf2-2 | 5'- GGUUGAGACUACCAUGGUU-3'   |

**Supplementary Table 5. Probe sequences used for EMSAs**

| EMSA probe (30 bp) | Sequence                                                            |
|--------------------|---------------------------------------------------------------------|
| ARE1               | 5'- CTAGGCGTGGTGACTCAGCCTGTAATCACA-3'                               |
| ARE1mut            | 5'- CTAGGCGT <b>GAGAGAT</b> CAGCCTGTAATCACA-3' (Bold, mutant sites) |
| ARE2               | 5'- GACTAAGCCATGATAGTGCCACTGCACTCC-3'                               |
| ARE3               | 5'- GCAGTGAGCTGAGACGGCGCCACTGCACTC-3'                               |

**Supplementary Table 6. Clinical characteristics of the breast tissues, including breast carcinoma tissue, carcinoma metastasized to the lymph nodes, and normal tissue samples.**

| Age | Sex | Organ/Anatomical Site | Pathological diagnosis                   | TNM | Grade | Stage | Type |
|-----|-----|-----------------------|------------------------------------------|-----|-------|-------|------|
| 38  | F   | Breast                | Adjacent normal breast tissue (adenosis) | -   | -     | -     | NAT  |
| 48  | F   | Breast                | Adjacent normal breast tissue (adenosis) | -   | -     | -     | NAT  |
| 41  | F   | Breast                | Adjacent normal breast tissue (adenosis) | -   | -     | -     | NAT  |
| 49  | F   | Breast                | Adjacent normal breast tissue (adenosis) | -   | -     | -     | NAT  |
| 37  | F   | Breast                | Adjacent normal breast tissue (adenosis) | -   | -     | -     | NAT  |
| 46  | F   | Breast                | Adjacent normal breast tissue            | -   | -     | -     | NAT  |
| 41  | F   | Breast                | Adjacent normal breast tissue (adenosis) | -   | -     | -     | NAT  |
| 41  | F   | Breast                | Adjacent normal breast tissue            | -   | -     | -     | NAT  |
| 53  | F   | Breast                | Adjacent normal breast tissue (adenosis) | -   | -     | -     | NAT  |
| 40  | F   | Breast                | Adjacent normal breast tissue (adenosis) | -   | -     | -     | NAT  |
| 35  | F   | Breast                | Adjacent normal breast tissue            | -   | -     | -     | NAT  |
| 47  | F   | Breast                | Adjacent normal breast tissue (adenosis) | -   | -     | -     | NAT  |

|    |   |        |                                          |        |   |      |           |
|----|---|--------|------------------------------------------|--------|---|------|-----------|
| 42 | F | Breast | Adjacent normal breast tissue (adenosis) | -      | - | -    | NAT       |
| 44 | F | Breast | Adjacent normal breast tissue (adenosis) | -      | - | -    | NAT       |
| 46 | F | Breast | Adjacent normal breast tissue (adenosis) | -      | - | -    | NAT       |
| 29 | F | Breast | Adjacent normal breast tissue            | -      | - | -    | NAT       |
| 50 | F | Breast | Adjacent normal breast tissue (adenosis) | -      | - | -    | NAT       |
| 43 | F | Breast | Adjacent normal breast tissue (adenosis) | -      | - | -    | NAT       |
| 60 | F | Breast | Adjacent normal breast tissue            | -      | - | -    | NAT       |
| 46 | F | Breast | Adjacent normal breast tissue (adenosis) | -      | - | -    | NAT       |
| 55 | F | Breast | Invasive ductal carcinoma                | T2N0M0 | 2 | IIA  | Malignant |
| 32 | F | Breast | Invasive ductal carcinoma                | T2N0M0 | 2 | IIB  | Malignant |
| 59 | F | Breast | Invasive ductal carcinoma                | T2N0M0 | 2 | I    | Malignant |
| 87 | F | Breast | Invasive ductal carcinoma                | T2N1M0 | 2 | I    | Malignant |
| 67 | F | Breast | Invasive ductal carcinoma                | T2N0M0 | 3 | IIIB | Malignant |
| 45 | F | Breast | Invasive ductal carcinoma                | T2N2M0 | 2 | IIB  | Malignant |
| 45 | F | Breast | Invasive ductal carcinoma                | T2N0M0 | 2 | IIA  | Malignant |
| 58 | F | Breast | Invasive ductal carcinoma                | T3N0M0 | 2 | IIA  | Malignant |
| 46 | F | Breast | Invasive ductal carcinoma                | T2N1M0 | 2 | IIA  | Malignant |
| 54 | F | Breast | Invasive ductal carcinoma                | T1N0M0 | 2 | IIB  | Malignant |
| 50 | F | Breast | Invasive ductal carcinoma                | T2N0M0 | 2 | IIA  | Malignant |
| 69 | F | Breast | Invasive ductal carcinoma                | T2N0M0 | 3 | IIA  | Malignant |
| 44 | F | Breast | Invasive ductal carcinoma                | T2N0M0 | 2 | IIA  | Malignant |
| 52 | F | Breast | Invasive ductal carcinoma                | T2N0M0 | 2 | IIA  | Malignant |
| 38 | F | Breast | Invasive ductal carcinoma                | T2N0M0 | 2 | IIA  | Malignant |
| 41 | F | Breast | Invasive ductal carcinoma                | T2N0M0 | 2 | IIA  | Malignant |
| 47 | F | Breast | Invasive ductal carcinoma                | T4N0M0 | 3 | I    | Malignant |
| 64 | F | Breast | Invasive ductal carcinoma                | T2N0M0 | 2 | IIB  | Malignant |
| 56 | F | Breast | Invasive ductal carcinoma                | T1N0M0 | 2 | IIA  | Malignant |
| 95 | F | Breast | Invasive ductal carcinoma                | T2N0M0 | 2 | IIA  | Malignant |
| 52 | F | Breast | Invasive ductal carcinoma                | T2N0M0 | 2 | IIB  | Malignant |
| 48 | F | Breast | Invasive ductal carcinoma                | T2N0M0 | 2 | IIA  | Malignant |
| 49 | F | Breast | Invasive ductal carcinoma                | T2N1M0 | 2 | IIA  | Malignant |
| 52 | F | Breast | Invasive ductal carcinoma                | T2N0M0 | 2 | IIB  | Malignant |
| 38 | F | Breast | Invasive ductal carcinoma                | T2N1M0 | 2 | IIA  | Malignant |
| 44 | F | Breast | Invasive ductal carcinoma                | T2N0M0 | 2 | IIA  | Malignant |
| 43 | F | Breast | Invasive ductal carcinoma                | T2N0M0 | 2 | IIIB | Malignant |

|    |   |        |                           |        |   |      |           |
|----|---|--------|---------------------------|--------|---|------|-----------|
| 46 | F | Breast | Invasive ductal carcinoma | T2N0M0 | 3 | IIA  | Malignant |
| 74 | F | Breast | Invasive ductal carcinoma | T1N0M0 | 2 | IIIB | Malignant |
| 50 | F | Breast | Invasive ductal carcinoma | T4N0M0 | 2 | IIIB | Malignant |
| 71 | F | Breast | Invasive ductal carcinoma | T1N0M0 | 1 | IIA  | Malignant |
| 42 | F | Breast | Invasive ductal carcinoma | T2N1M0 | 2 | IIIA | Malignant |
| 48 | F | Breast | Invasive ductal carcinoma | T1N0M0 | 2 | IIA  | Malignant |
| 49 | F | Breast | Invasive ductal carcinoma | T2N0M0 | 2 | IIA  | Malignant |
| 45 | F | Breast | Invasive ductal carcinoma | T4N2M0 | 2 | IIA  | Malignant |
| 50 | F | Breast | Invasive ductal carcinoma | T2N0M0 | 2 | I    | Malignant |
| 44 | F | Breast | Invasive ductal carcinoma | T2N0M0 | 2 | IIA  | Malignant |
| 36 | F | Breast | Invasive ductal carcinoma | T3N0M0 | 1 | IIA  | Malignant |
| 42 | F | Breast | Invasive ductal carcinoma | T2N1M0 | 2 | IIA  | Malignant |
| 48 | F | Breast | Invasive ductal carcinoma | T3N0M0 | 2 | I    | Malignant |
| 39 | F | Breast | Invasive ductal carcinoma | T2N0M0 | 2 | IIIB | Malignant |
| 42 | F | Breast | Invasive ductal carcinoma | T2N0M0 | 3 | IIA  | Malignant |
| 50 | F | Breast | Invasive ductal carcinoma | T2N0M0 | 2 | IIA  | Malignant |
| 36 | F | Breast | Invasive ductal carcinoma | T2N1M0 | 2 | IIA  | Malignant |
| 50 | F | Breast | Invasive ductal carcinoma | T2N0M0 | 3 | IIA  | Malignant |
| 46 | F | Breast | Invasive ductal carcinoma | T2N0M0 | 2 | IIIB | Malignant |
| 38 | F | Breast | Invasive ductal carcinoma | T2N0M0 | 2 | IIIB | Malignant |
| 45 | F | Breast | Invasive ductal carcinoma | T4N0M0 | 3 | IIA  | Malignant |
| 41 | F | Breast | Invasive ductal carcinoma | T2N0M0 | 2 | IIA  | Malignant |
| 43 | F | Breast | Invasive ductal carcinoma | T3N1M0 | 2 | IIA  | Malignant |
| 68 | F | Breast | Invasive ductal carcinoma | T2N0M0 | 3 | IIA  | Malignant |
| 52 | F | Breast | Invasive ductal carcinoma | T3N0M0 | 2 | IIA  | Malignant |
| 45 | F | Breast | Invasive ductal carcinoma | T2N0M0 | 2 | IIIA | Malignant |
| 47 | F | Breast | Invasive ductal carcinoma | T1N1M0 | 2 | IIIB | Malignant |
| 46 | F | Breast | Invasive ductal carcinoma | T2N0M0 | 2 | IIA  | Malignant |
| 61 | F | Breast | Invasive ductal carcinoma | T2N0M0 | 2 | IIA  | Malignant |
| 37 | F | Breast | Invasive ductal carcinoma | T2N0M0 | 2 | IIA  | Malignant |
| 66 | F | Breast | Invasive ductal carcinoma | T2N0M0 | 1 | IIIB | Malignant |
| 46 | F | Breast | Invasive ductal carcinoma | T4N0M0 | 2 | IIIB | Malignant |
| 39 | F | Breast | Invasive ductal carcinoma | T4N1M0 | 1 | IIIA | Malignant |
| 51 | F | Breast | Invasive ductal carcinoma | T2N0M0 | 2 | IIIB | Malignant |
| 47 | F | Breast | Invasive ductal carcinoma | T2N0M0 | 2 | IIA  | Malignant |
| 42 | F | Breast | Invasive ductal carcinoma | T2N0M0 | 2 | IIA  | Malignant |
| 48 | F | Breast | Invasive ductal carcinoma | T4N0M0 | 2 | IIIB | Malignant |
| 38 | F | Breast | Invasive ductal carcinoma | T2N0M0 | 2 | IIA  | Malignant |
| 62 | F | Breast | Invasive ductal carcinoma | T2N0M0 | 2 | IIIB | Malignant |
| 35 | F | Breast | Invasive ductal carcinoma | T2N0M0 | 2 | IIA  | Malignant |
| 59 | F | Breast | Invasive ductal carcinoma | T2N1M0 | 3 | IIA  | Malignant |
| 38 | F | Breast | Invasive ductal carcinoma | T3N1M0 | 2 | IIA  | Malignant |
| 55 | F | Breast | Invasive ductal carcinoma | T2N1M0 | 2 | IIIB | Malignant |

|    |   |            |                                       |   |   |   |            |
|----|---|------------|---------------------------------------|---|---|---|------------|
| 43 | F | Lymph node | Metastatic invasive ductal carcinoma  | - | 2 | - | Metastasis |
| 55 | F | Lymph node | Metastatic invasive lobular carcinoma | - | 2 | - | Metastasis |
| 48 | F | Lymph node | Metastatic invasive ductal carcinoma  | - | 2 | - | Metastasis |
| 51 | F | Lymph node | Metastatic invasive ductal carcinoma  | - | 3 | - | Metastasis |
| 69 | F | Lymph node | Metastatic invasive ductal carcinoma  | - | 2 | - | Metastasis |
| 38 | F | Lymph node | Metastatic invasive ductal carcinoma  | - | 3 | - | Metastasis |
| 37 | F | Lymph node | Metastatic invasive ductal carcinoma  | - | 3 | - | Metastasis |
| 32 | F | Lymph node | Metastatic invasive ductal carcinoma  | - | 3 | - | Metastasis |
| 51 | F | Lymph node | Metastatic invasive ductal carcinoma  | - | 2 | - | Metastasis |
| 51 | F | Lymph node | Metastatic invasive lobular carcinoma | - | 2 | - | Metastasis |
| 56 | F | Lymph node | Metastatic invasive ductal carcinoma  | - | 2 | - | Metastasis |
| 71 | F | Lymph node | Metastatic invasive ductal carcinoma  | - | - | - | Metastasis |
| 47 | F | Lymph node | Metastatic invasive ductal carcinoma  | - | 2 | - | Metastasis |
| 43 | F | Lymph node | Metastatic invasive ductal carcinoma  | - | 2 | - | Metastasis |
| 55 | F | Lymph node | Metastatic invasive ductal carcinoma  | - | 2 | - | Metastasis |
| 51 | F | Lymph node | Metastatic invasive ductal carcinoma  | - | 1 | - | Metastasis |
| 58 | F | Lymph node | Metastatic invasive ductal carcinoma  | - | 2 | - | Metastasis |
| 49 | F | Lymph node | Metastatic invasive ductal carcinoma  | - | 2 | - | Metastasis |
| 28 | F | Lymph node | Metastatic invasive ductal carcinoma  | - | 2 | - | Metastasis |
| 51 | F | Lymph node | Metastatic invasive ductal carcinoma  | - | 3 | - | Metastasis |
| 52 | F | Lymph node | Metastatic invasive ductal carcinoma  | - | 2 | - | Metastasis |
| 35 | F | Lymph node | Metastatic invasive ductal carcinoma  | - | 2 | - | Metastasis |

|    |   |            |                                       |   |   |   |            |
|----|---|------------|---------------------------------------|---|---|---|------------|
|    |   |            | carcinoma                             |   |   |   |            |
| 52 | F | Lymph node | Metastatic invasive ductal carcinoma  | - | 2 | - | Metastasis |
| 59 | F | Lymph node | Metastatic invasive ductal carcinoma  | - | - | - | Metastasis |
| 51 | F | Lymph node | Metastatic invasive ductal carcinoma  | - | 2 | - | Metastasis |
| 50 | F | Lymph node | Metastatic invasive ductal carcinoma  | - | 2 | - | Metastasis |
| 42 | F | Lymph node | Metastatic invasive ductal carcinoma  | - | 1 | - | Metastasis |
| 36 | F | Lymph node | Metastatic invasive ductal carcinoma  | - | 2 | - | Metastasis |
| 44 | F | Lymph node | Metastatic invasive ductal carcinoma  | - | 2 | - | Metastasis |
| 52 | F | Lymph node | Metastatic invasive ductal carcinoma  | - | 1 | - | Metastasis |
| 50 | F | Lymph node | Metastatic invasive ductal carcinoma  | - | 2 | - | Metastasis |
| 58 | F | Lymph node | Metastatic invasive ductal carcinoma  | - | 1 | - | Metastasis |
| 57 | F | Lymph node | Metastatic invasive lobular carcinoma | - | 2 | - | Metastasis |
| 43 | F | Lymph node | Metastatic invasive ductal carcinoma  | - | 2 | - | Metastasis |
| 68 | F | Lymph node | Metastatic invasive ductal carcinoma  | - | 2 | - | Metastasis |
| 59 | F | Lymph node | Metastatic invasive ductal carcinoma  | - | 2 | - | Metastasis |
| 70 | F | Lymph node | Metastatic invasive ductal carcinoma  | - | 2 | - | Metastasis |
| 46 | F | Lymph node | Metastatic invasive ductal carcinoma  | - | 2 | - | Metastasis |

**Supplementary Table 7: Clinical characteristics of breast invasive carcinoma (TCGA, PanCancer**

**Atlas) patients with complete data demographics**

| <b>Cancer Type Detailed</b>       | <b>Number</b> | <b>Percentage</b> |
|-----------------------------------|---------------|-------------------|
| Breast Invasive Ductal Carcinoma  | 741           | 74.50%            |
| Breast Invasive Lobular Carcinoma | 162           | 16.30%            |
| Breast Invasive Carcinoma (NOS)   | 71            | 7.10%             |

|                                                                             |               |                   |
|-----------------------------------------------------------------------------|---------------|-------------------|
| Breast Invasive Mixed Mucinous Carcinoma                                    | 13            | 1.30%             |
| Metaplastic Breast Cancer                                                   | 6             | 0.60%             |
| Invasive Breast Carcinoma                                                   | 1             | <0.1%             |
| <b>Subtype</b>                                                              | <b>Number</b> | <b>Percentage</b> |
| BRCA_LumA                                                                   | 499           | 50.20%            |
| BRCA_LumB                                                                   | 197           | 19.80%            |
| BRCA_Basal                                                                  | 171           | 17.20%            |
| NA                                                                          | 13            | 1.30%             |
| BRCA_Her2                                                                   | 78            | 7.80%             |
| BRCA_Normal                                                                 | 36            | 3.60%             |
| <b>Diagnosis Age</b>                                                        | <b>Number</b> | <b>Percentage</b> |
| ≤30                                                                         | 12            | 1.21%             |
| 30-40                                                                       | 80            | 8.05%             |
| 40-50                                                                       | 207           | 20.82%            |
| 50-60                                                                       | 253           | 25.45%            |
| 60-70                                                                       | 257           | 25.86%            |
| 70-80                                                                       | 137           | 13.78%            |
| 80-90                                                                       | 48            | 4.83%             |
| <b>Race Category</b>                                                        | <b>Number</b> | <b>Percentage</b> |
| White                                                                       | 687           | 69.10%            |
| Black or African American                                                   | 162           | 16.30%            |
| NA                                                                          | 85            | 8.60%             |
| Asian                                                                       | 59            | 5.90%             |
| American Indian or Alaska Native                                            | 1             | 0.10%             |
| <b>Neoplasm Disease Stage<br/>(American Joint Committee on Cancer Code)</b> |               |                   |
| STAGE IIB                                                                   | 234           | 23.50%            |
| STAGE IIIA                                                                  | 139           | 14.00%            |
| STAGE I                                                                     | 83            | 8.40%             |
| STAGE IA                                                                    | 78            | 7.80%             |
| STAGE IIIC                                                                  | 51            | 5.10%             |
| STAGE IIIB                                                                  | 26            | 2.60%             |
| STAGE IV                                                                    | 18            | 1.80%             |
| STAGE X                                                                     | 13            | 1.30%             |
| STAGE II                                                                    | 6             | 0.60%             |
| STAGE IB                                                                    | 5             | 0.50%             |
| NA                                                                          | 5             | 0.50%             |
| STAGE III                                                                   | 2             | 0.20%             |
| <b>Total</b>                                                                | <b>994</b>    |                   |

## Supplementary Figures and Legends

**Supplementary Figure S1**



**Figure S1.** (A) HBXIP and Prdx1 protein levels in the indicated breast cancer cells and normal breast epithelial cells were measured using western blot analysis. (B) The expression level of HBXIP in T47D, MDA-MB-231 and SK-BR3 cells cultured in attachment and suspension was detected using western



blot analysis. (C) *HBXIP* promoter activity was investigated in MCF-7 and MDA-MB-436 cells, which were detached and cultured in suspension in poly-HEMA-coated plates for the indicated times. (D) The “rescued” expression of flag-Nrf2 in Nrf2 knockout MEFs was detected using western blotting. (E) After treatment of MCF-7 and MDA-MB-436 cells with 40 nM brusatol, a specific Nrf2 inhibitor, for 4 h, changes in *HBXIP* promoter activity were detected. Western blot shows the expression of *HBXIP* and Nrf2 in the indicated cells. (F) Putative cis-acting AREs were analyzed using the Cistrome Analysis Pipeline (<http://cistrome.org/>). (G) SK-BR3 and MDA-MB-436 cells detached for 8 h were fixed with formaldehyde and cross-linked, and chromatin was sheared ultrasonically. Chromatin was immunoprecipitated with an anti-Nrf2 rabbit monoclonal antibody (mAb) or rabbit (DA1E) control IgG mAb. Nrf2 binding to the *HBXIP* promoter was analyzed via PCR with primers specific for the ARE1 region in the *HBXIP* promoter. GAPDH primers were used as a negative control. The ARE1 region in the *HBXIP* promoter was amplified from 5  $\mu$ l of purified soluble chromatin before immunoprecipitation for use as input DNA. (H) *HBXIP* ARE1 and ARE1mut (Supplementary Table 5) were end-labeled with [ $\gamma$ -<sup>32</sup>P]ATP and T4 kinase. Labeled DNA (100,000 cpm) was incubated with 10  $\mu$ g of MCF-7 nuclear extract in binding buffer. The reaction mixtures were separated on a polyacrylamide gel and autoradiographed. DNA-protein complexes containing Nrf2 are indicated. (I) The expression of *HBXIP* and Nrf2 in suspended cultured MCF-7 and MDA-MB-436 cells was detected in an increasing time course. (J) *HBXIP* and Nrf2 expression in the indicated stable breast cancer cell lines. (K) Nrf2 and *HBXIP* expression in *HBXIP*- and Nrf2-deficient MCF-7 cells treated with glucose oxidase (GOX) for 2 h. (L) *HBXIP* promoter activity was investigated in MCF-7 and MDA-MB-436 cells in detached culture for 8 hours after treatment with 5 mM NAC. The error bars indicate the  $\pm$ SD values assessed determined using Student's *t* test. All experiments were performed at least 3 times.

**Supplementary Figure S2**



**Figure S2.** (A) The indicated stable MCF-7 and MDA-MB-436 cell lines cultured in suspension for 48 h

were a) stained with CM-H<sub>2</sub>DCFDA and subjected to flow cytometry to determine the intracellular ROS level; b) stained with MitoSOX Red, and the ROS levels were determined; c) used to measure the reduced GSH levels; d) used to measure NADPH levels; e) used to assess the mitochondrial membrane potential using a JC1 assay; f) used to measure ATP with an ATP determination kit. (B) HBXIP and Prdx1 protein expression levels (z scores, mass spectrometry by CPTAC) were analyzed in 104 eligible clinical breast cancer samples (Pearson's correlation coefficient;  $r = 0.43$ , Spearman's correlation coefficient = 0.38). C Heatmaps showing the correlation between Prdx1 and HBXIP (*laminB5*) mRNA expression (upper panel) and protein expression (lower panel). (D) Breast cancer patients (2463) filtered by high HBXIP expression on Kaplan-Meier Plotter platforms. A recurrence-free survival (RFS) curve of the HBXIP high/Prdx1 high group and HBXIP high/Prdx1 low group was generated using the Kaplan-Meier method and compared statistically using a log rank test. The error bars indicate the  $\pm$  SD values as assessed by Student's *t* test. All the experiments were performed at least 3 times.

### Supplementary Figure S3



**Figure S3.** (A) The “rescued” expression of Prdx1 and Prdx1 C52S mutant in Prdx1-deficient MCF-7 and MDA-MB-436 cells was detected using western blotting. (B) The indicated cells in (A) cultured in suspension for 48 h were stained with CM-H<sub>2</sub>DCFDA and subjected to flow cytometry to determine the intracellular ROS level. (C) The indicated cells in (A) cultured in suspension for 48 h were stained with Annexin V and subjected to flow cytometry to determine the apoptosis rate. The error bars indicate the  $\pm$  SD values as assessed by Student’s *t* test. All the experiments were performed at least 3 times.

### Supplementary Figure S4



Figure S4: FSC/SSC plot and gating strategies of Figure1D

**Supplementary Figure S5**

Figure 1A left panel, HBXIP



Figure 1A Right panel, HBXIP



Figure 1F left panel, Caspase-7 and Cleaved Caspase-7



Figure 1F Right panel, Caspase-3 and Cleaved Caspase-3



Figure 5C, Right panel, Prdx1



Figure 5D, Right panel, Prdx1



Figure 5C, Left panel, JNK1



Figure 5D, Left panel, JNK1



**Figure S5:** Uncropped western blot images related to the indicated important blots.
