# Supplementary material for: HBXIP induces anoikis resistance by forming a reciprocal feedback loop with Nrf2 to maintain redox homeostasis and stabilize Prdx1 in breast cancer
Source: PubMed Central journal article supplement (PMC8758767; doi:10.1038/s41523-021-00374-x), 2022-01-13
Supplement: 41523_2021_374_MOESM2_ESM.pdf [file 41523_2021_374_MOESM2_ESM.pdf]

## Reporting Summary

Nature Portfolio wishes to improve the reproducibility of the work that we publish. This form provides structure for consistency and transparency in reporting. For further information on Nature Portfolio policies, see our [Editorial Policies](#) and the [Editorial Policy Checklist](#).

### Statistics

For all statistical analyses, confirm that the following items are present in the figure legend, table legend, main text, or Methods section.

n/a Confirmed

- The exact sample size ( $n$ ) for each experimental group/condition, given as a discrete number and unit of measurement
- A statement on whether measurements were taken from distinct samples or whether the same sample was measured repeatedly
- The statistical test(s) used AND whether they are one- or two-sided  
*Only common tests should be described solely by name; describe more complex techniques in the Methods section.*
- A description of all covariates tested
- A description of any assumptions or corrections, such as tests of normality and adjustment for multiple comparisons
- A full description of the statistical parameters including central tendency (e.g. means) or other basic estimates (e.g. regression coefficient) AND variation (e.g. standard deviation) or associated estimates of uncertainty (e.g. confidence intervals)
- For null hypothesis testing, the test statistic (e.g.  $F$ ,  $t$ ,  $r$ ) with confidence intervals, effect sizes, degrees of freedom and  $P$  value noted  
*Give  $P$  values as exact values whenever suitable.*
- For Bayesian analysis, information on the choice of priors and Markov chain Monte Carlo settings
- For hierarchical and complex designs, identification of the appropriate level for tests and full reporting of outcomes
- Estimates of effect sizes (e.g. Cohen's  $d$ , Pearson's  $r$ ), indicating how they were calculated

*Our web collection on [statistics for biologists](#) contains articles on many of the points above.*

### Software and code

Policy information about [availability of computer code](#)

Data collection qPCR-Bio-Rad CFX Maestro 1.0, BD FACSCanto™ II (BD Biosciences), Bio-Rad Gel Doc XR+

Data analysis Microsoft Office Excel 2019 ProPlus, GraphPad Prism 9.0, BD CellQuest™ software version 5.1, Quantity One v4.6, ImageJ

For manuscripts utilizing custom algorithms or software that are central to the research but not yet described in published literature, software must be made available to editors and reviewers. We strongly encourage code deposition in a community repository (e.g. GitHub). See the Nature Portfolio [guidelines for submitting code & software](#) for further information.

### Data

Policy information about [availability of data](#)

All manuscripts must include a [data availability statement](#). This statement should provide the following information, where applicable:

- Accession codes, unique identifiers, or web links for publicly available datasets
- A description of any restrictions on data availability
- For clinical datasets or third party data, please ensure that the statement adheres to our [policy](#)

The datasets generated and analyzed during the current study are available from the corresponding author, Dr. Xiaolei Zhou (email address: foxlei@live.cn), upon reasonable request, as described in the following figshare metadata record: <https://10.6084/m9.figshare.17088764>. The full sequences of the newly constructed plasmids for this study are deposited in Addgene under the ID numbers listed in Supplementary table 1.

## Field-specific reporting

Please select the one below that is the best fit for your research. If you are not sure, read the appropriate sections before making your selection.

Life sciences  Behavioural & social sciences  Ecological, evolutionary & environmental sciences

For a reference copy of the document with all sections, see [nature.com/documents/nr-reporting-summary-flat.pdf](https://www.nature.com/documents/nr-reporting-summary-flat.pdf)

## Life sciences study design

All studies must disclose on these points even when the disclosure is negative.

|                 |                                                                                                                                                                                                                          |
|-----------------|--------------------------------------------------------------------------------------------------------------------------------------------------------------------------------------------------------------------------|
| Sample size     | For in vitro study, all the experiments were repeated at least three independent times with technical triplicates. For in vivo study, the sample size were estimated based on preliminary data or for statistical power. |
| Data exclusions | No data were excluded.                                                                                                                                                                                                   |
| Replication     | Replicate experiments were successful.                                                                                                                                                                                   |
| Randomization   | For in vitro study, cells for different groups were treated randomized. For in vivo study, animal injected with cells were chosen randomly.                                                                              |
| Blinding        | Blinding was not relevant to this study because no bias could be made by the subject or the tester in the experiments performed.                                                                                         |

## Reporting for specific materials, systems and methods

We require information from authors about some types of materials, experimental systems and methods used in many studies. Here, indicate whether each material, system or method listed is relevant to your study. If you are not sure if a list item applies to your research, read the appropriate section before selecting a response.

### Materials & experimental systems

|                                     |                                                                 |
|-------------------------------------|-----------------------------------------------------------------|
| n/a                                 | Involved in the study                                           |
| <input type="checkbox"/>            | <input checked="" type="checkbox"/> Antibodies                  |
| <input type="checkbox"/>            | <input checked="" type="checkbox"/> Eukaryotic cell lines       |
| <input checked="" type="checkbox"/> | <input type="checkbox"/> Palaeontology and archaeology          |
| <input type="checkbox"/>            | <input checked="" type="checkbox"/> Animals and other organisms |
| <input checked="" type="checkbox"/> | <input type="checkbox"/> Human research participants            |
| <input checked="" type="checkbox"/> | <input type="checkbox"/> Clinical data                          |
| <input checked="" type="checkbox"/> | <input type="checkbox"/> Dual use research of concern           |

### Methods

|                                     |                                                    |
|-------------------------------------|----------------------------------------------------|
| n/a                                 | Involved in the study                              |
| <input checked="" type="checkbox"/> | <input type="checkbox"/> ChIP-seq                  |
| <input type="checkbox"/>            | <input checked="" type="checkbox"/> Flow cytometry |
| <input checked="" type="checkbox"/> | <input type="checkbox"/> MRI-based neuroimaging    |

## Antibodies

### Antibodies used

NTI- $\beta$ -actin (clone AC-74) Mouse mAb (Sigma-Aldrich (St. Louis, MO, USA) Cat# A2228, RRID: AB\_476697) ANTI-FLAG<sup>®</sup> M2 Mouse mAb (Sigma-Aldrich (St. Louis, MO, USA) Cat# F1804, RRID: AB\_262044) Anti-HBXIP (H-5) Mouse mAb (Santa Cruz Biotechnology Cat# sc-373980, RRID: AB\_10918789) Anti-NRF2 (D1Z9C) XP<sup>®</sup> Rabbit mAb Cell Signaling Technology (Danvers, MA, USA) Cat# 12721, RRID: AB\_2715528) Rabbit (DA1E) mAb IgG XP<sup>®</sup> Isotype Control (Cell Signaling Technology (Danvers, MA, USA) Cat# 3900, RRID: AB\_1550038) Anti-Caspase-3 (3G2) Mouse mAb (Cell Signaling Technology (Danvers, MA, USA) Cat# 9668, RRID: AB\_2069870) Anti-PARP (46D11) Rabbit mAb (Cell Signaling Technology (Danvers, MA, USA) Cat# 9532, RRID: AB\_659884) Anti-Lamin B1 (D9V6H) Rabbit mAb (Cell Signaling Technology (Danvers, MA, USA) Cat# 15068, RRID: AB\_2798695) Anti-GST3/GSTpi Goat pAb (Abcam (Cambridge, MA) Cat# ab53943, RRID: AB\_873819) Goat IgG Isotype Control (Invitrogen, Thermo Fisher Scientific, USA Cat# 02-6202, RRID: AB\_2532946) Anti-JNK1 Rabbit mAb (Abcam (Cambridge, MA) Cat# ab110724, RRID: AB\_10866293) Anti-phospho-JNK1 Rabbit mAb (Abcam (Cambridge, MA) Cat# ab46821, RRID: AB\_881487) Anti-Peroxiredoxin 1 Mouse mAb (R&D Systems (Minneapolis, MN, USA) Cat# MAB3488, RRID: AB\_2170319) Anti-E6AP Rabbit pAb (Abcam (Cambridge, MA) Cat# ab3519, RRID: AB\_303868) Anti-Human Ubiquitin Rabbit pAb (R&D Systems (Minneapolis, MN, USA) Cat# A-100, RRID: AB\_10971295)

### Validation

Validations are based on the datasheets from the manufacturers.

## Eukaryotic cell lines

Policy information about [cell lines](#)

### Cell line source(s)

MCF-7 (Cat# HTB-22TM, Lot# 60012672, RRID: CVCL\_0031), MDA-MB-436 (Cat# HTB-130, Lot# 61331460, RRID: CVCL\_0623), HEK293 (Cat# CRL-1573™, Lot# 7681666, RRID: CVCL\_0045) and HEK293T (Cat# CRL-3216, RRID: CVCL\_0063) were obtained from ATCC; Nrf2-/- MEF lines were obtained from Tohoku University (Japan); Other stable cell lines were

|                                                                      |                                                              |
|----------------------------------------------------------------------|--------------------------------------------------------------|
|                                                                      | constructed in laboratory of Xiaolei Zhou.                   |
| Authentication                                                       | None of the cell lines used were authenticated.              |
| Mycoplasma contamination                                             | All cell lines tested negative for mycoplasma contamination. |
| Commonly misidentified lines<br>(See <a href="#">ICLAC</a> register) | No commonly misidentified cell lines were used.              |

## Animals and other organisms

Policy information about [studies involving animals](#); [ARRIVE guidelines](#) recommended for reporting animal research

|                         |                                                                                                                                                                              |
|-------------------------|------------------------------------------------------------------------------------------------------------------------------------------------------------------------------|
| Laboratory animals      | female Balb/c mice, 6 weeks old.                                                                                                                                             |
| Wild animals            | The study did not involve wild animals.                                                                                                                                      |
| Field-collected samples | The study did not involve samples collected from the field.                                                                                                                  |
| Ethics oversight        | All the experiments involving animals complied with protocols approved by the Institutional Animal Care and Use Committee of the Hebei University of Science and Technology. |

Note that full information on the approval of the study protocol must also be provided in the manuscript.

## Flow Cytometry

### Plots

Confirm that:

- The axis labels state the marker and fluorochrome used (e.g. CD4-FITC).
- The axis scales are clearly visible. Include numbers along axes only for bottom left plot of group (a 'group' is an analysis of identical markers).
- All plots are contour plots with outliers or pseudocolor plots.
- A numerical value for number of cells or percentage (with statistics) is provided.

### Methodology

|                           |                                                                                                                                                            |
|---------------------------|------------------------------------------------------------------------------------------------------------------------------------------------------------|
| Sample preparation        | Data provided in the manuscript.                                                                                                                           |
| Instrument                | BD FACSCanto™ II (BD Biosciences)                                                                                                                          |
| Software                  | BD CellQuest™ software (version 5.1; BD Biosciences)                                                                                                       |
| Cell population abundance | All the samples analyzed by flow cytometry were cell lines with different treatments. For each run, 5000 cells were analyzed based on previous experience. |
| Gating strategy           | FSC/SSC gates were done to exclude cell debris. The boundary between positive and negative staining cells was PE>10                                        |

- Tick this box to confirm that a figure exemplifying the gating strategy is provided in the Supplementary Information.
